# Supplementary material for: Target and actual sample sizes for studies from two trial registries from 1999 to 2020: an observational study
Source: HighWire-hosted journal article supplement (doi:10.1136/bmjopen-2021-053377), 2021-12-01
Supplement: bmjopen-2021-053377supp001_data_supplement.pdf [file bmjopen-2021-053377supp001_data_supplement.pdf]

## Supplement Figure 1: Flow diagrams of the number of studies included and excluded

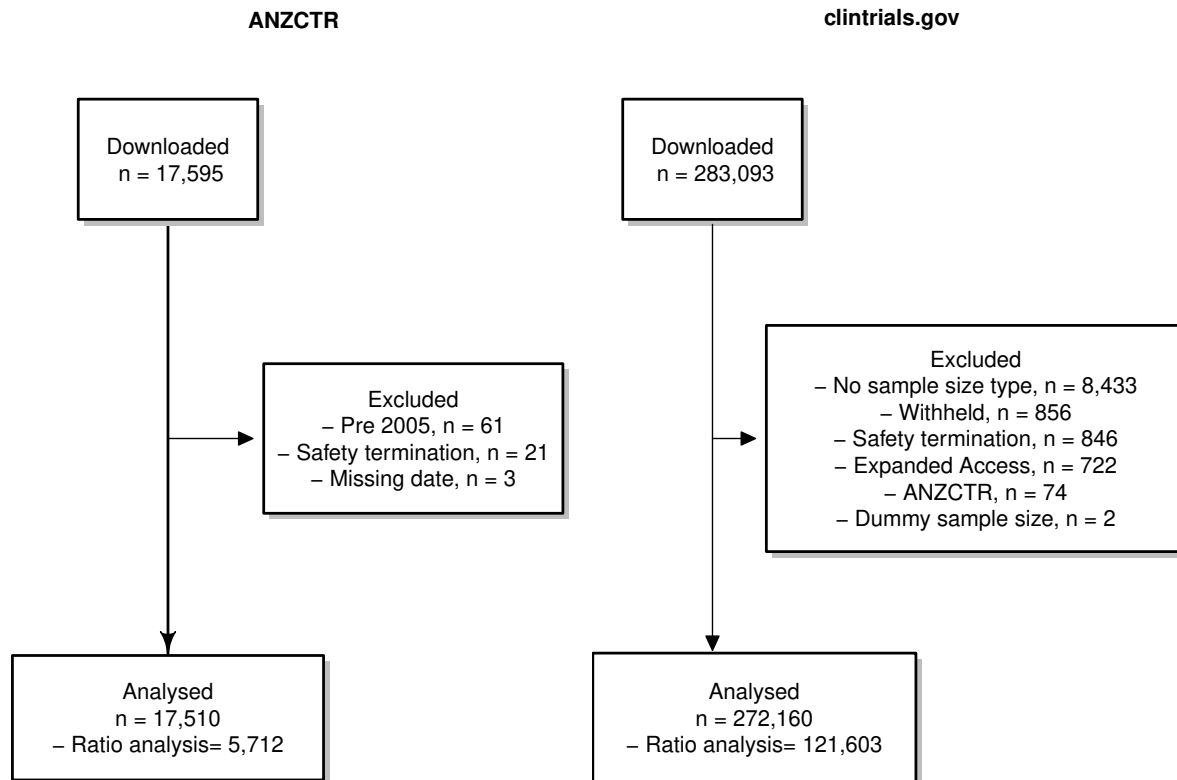

The numbers available for the actual-to-target ratio analysis are smaller because studies had to provide data for both the actual and sample size.
