# Supplementary material for: Target and actual sample sizes for studies from two trial registries from 1999 to 2020: an observational study
Source: HighWire-hosted journal article supplement (doi:10.1136/bmjopen-2021-053377), 2021-12-01
Supplement: bmjopen-2021-053377supp003_data_supplement.pdf [file bmjopen-2021-053377supp003_data_supplement.pdf]

## Supplement 1: Descriptive statistics and descriptions of missing data for the two databases

### Table of Contents

|                                                  |    |
|--------------------------------------------------|----|
| clinicaltrials.gov.....                          | 2  |
| Missing data (clinicaltrials.gov).....           | 2  |
| Registration and dates (clinicaltrials.gov)..... | 3  |
| Inclusions/Exclusions (clinicaltrials.gov) ..... | 3  |
| Study characteristics (clinicaltrials.gov).....  | 5  |
| Study status (clinicaltrials.gov) .....          | 7  |
| Funding (clinicaltrials.gov) .....               | 8  |
| Sample size (clinicaltrials.gov) .....           | 8  |
| ANZCTR.....                                      | 10 |
| Missing data (ANZCTR).....                       | 10 |
| Registration and dates (ANZCTR).....             | 11 |
| Inclusions/Exclusions (ANZCTR) .....             | 11 |
| Study characteristics (ANZCTR).....              | 13 |
| Health conditions (ANZCTR) .....                 | 16 |
| Study status (ANZCTR) .....                      | 17 |
| Sponsors and funding (ANZCTR).....               | 17 |
| Sample size (ANZCTR) .....                       | 19 |

## clinicaltrials.gov

There were 10,100 studies excluded. The total number of remaining studies is 272,988. The data were extracted from clinicaltrials.gov on 01-Feb-2021.

### Missing data (clinicaltrials.gov)

The plots below summarise the missing data. The columns are variables and the rows are observations. The grey areas show missing data. The coloured plots show a random sample of 10,000 studies as the data are too large to show every study.

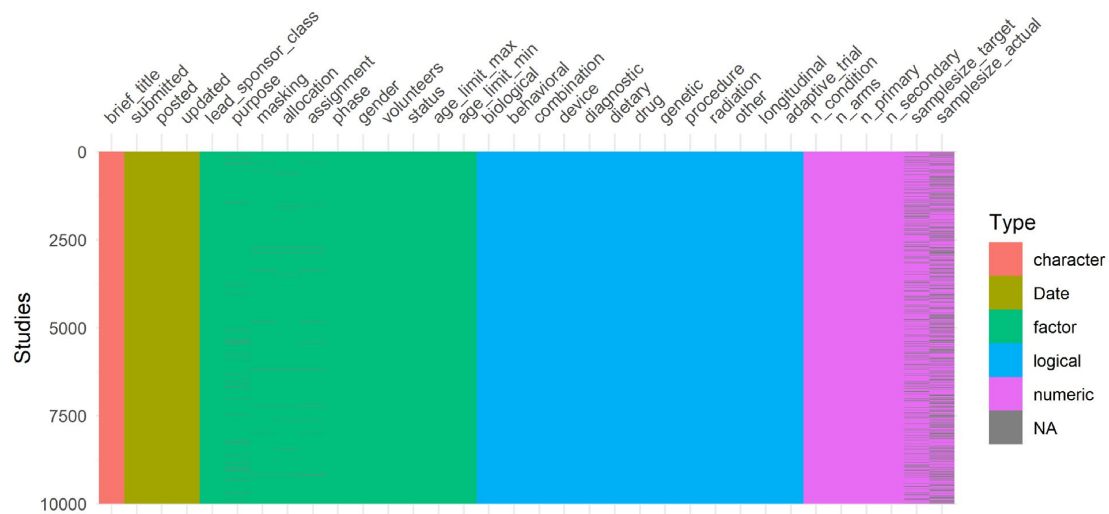

### Counts of missing data (clinicaltrials.gov)

The plots below shows the counts of missing data using all studies.

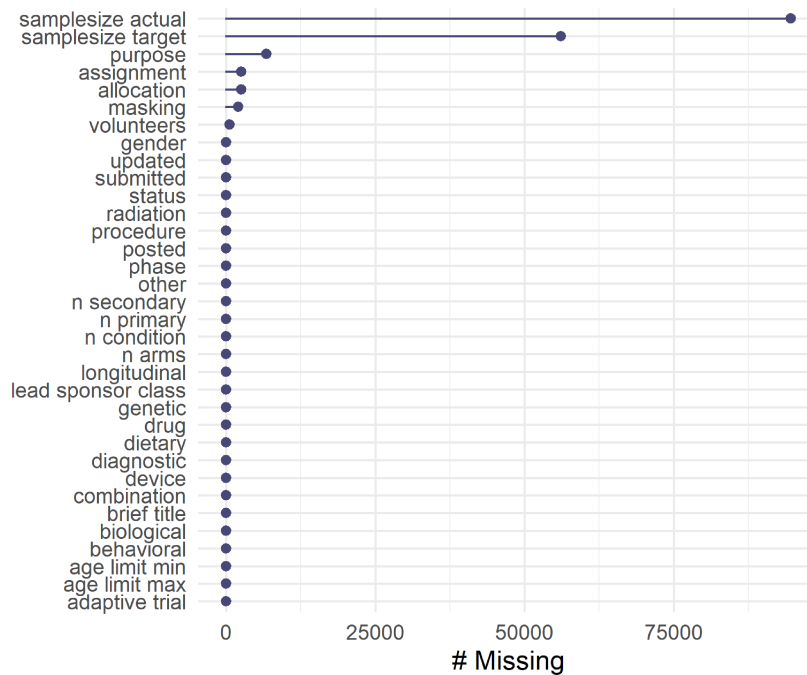

The total number of studies in 272,988.

Overall the amount of missing data was small. The most frequent missing variable was the study purpose which is the main objective of the intervention(s) being evaluated by the clinical trial. This was missing for 2% of studies.

The logical variables cannot be missing by design, for example 'longitudinal' was created by whether the word "longitudinal" was mentioned in the detailed study description or not.

Many variables were mandatory and so cannot be missing, e.g., study status.

## Registration and dates (clinicaltrials.gov)

### Registration dates (clinicaltrials.gov)

| date    | n       | median   | q1       | q3       |
|---------|---------|----------|----------|----------|
| posted  | 272,988 | Feb 2015 | Nov 2010 | May 2018 |
| updated | 272,988 | Jun 2018 | May 2015 | Apr 2020 |

The summary statistics are the median and inter-quartile range.

## Inclusions/Exclusions (clinicaltrials.gov)

### Gender included (clinicaltrials.gov)

|     | Freq   | % Valid | % Total |
|-----|--------|---------|---------|
| All | 232734 | 85      | 85      |

|                   |        |     |     |
|-------------------|--------|-----|-----|
| <b>Female</b>     | 26511  | 10  | 10  |
| <b>Male</b>       | 13742  | 5   | 5   |
| <b>&lt;NA&gt;</b> | 1      |     | 0   |
| <b>Total</b>      | 272988 | 100 | 100 |

### Age included (clinicaltrials.gov)

#### Minimum age (clinicaltrials.gov)

|                   | Freq   | % Valid | % Total |
|-------------------|--------|---------|---------|
| <b>Restricted</b> | 258396 | 95      | 95      |
| <b>No limit</b>   | 14592  | 5       | 5       |
| <b>&lt;NA&gt;</b> | 0      |         | 0       |
| <b>Total</b>      | 272988 | 100     | 100     |

#### Minimum age limit in years (clinicaltrials.gov)

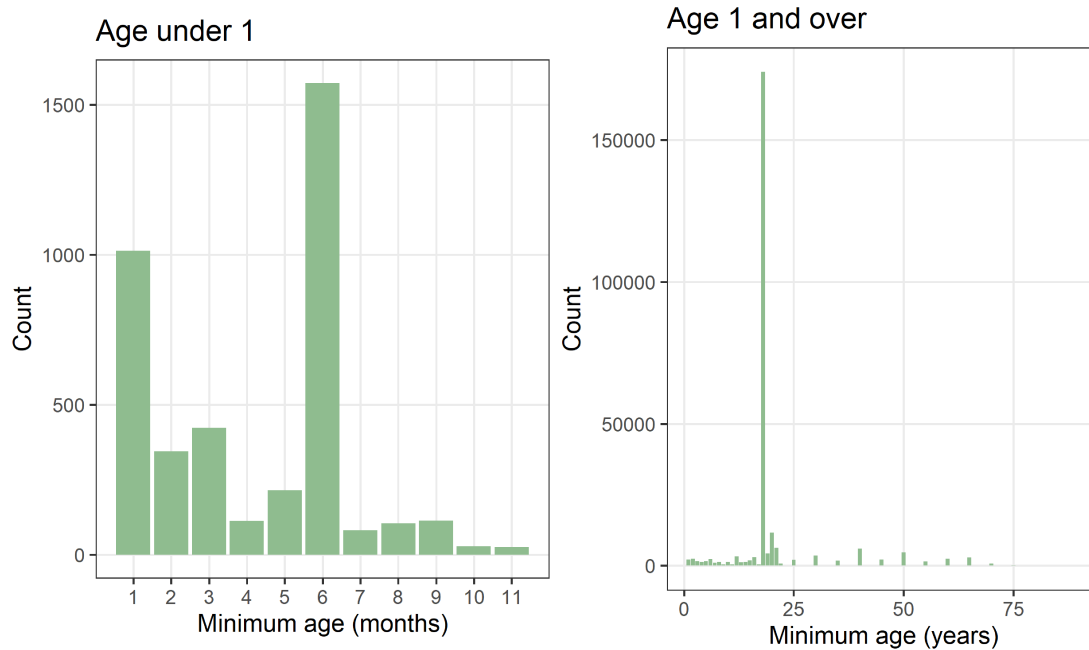

This plot is just for the 258,396 studies that had a minimum age limit. By far the most common minimum age is 18. The oldest exclusion for minimum age was 90 years.

#### Maximum age (clinicaltrials.gov)

|                   | Freq   | % Valid | % Total |
|-------------------|--------|---------|---------|
| <b>Restricted</b> | 150717 | 55      | 55      |
| <b>No limit</b>   | 122271 | 45      | 45      |
| <b>&lt;NA&gt;</b> | 0      |         | 0       |
| <b>Total</b>      | 272988 | 100     | 100     |

*Maximum age limit in years (clinicaltrials.gov)*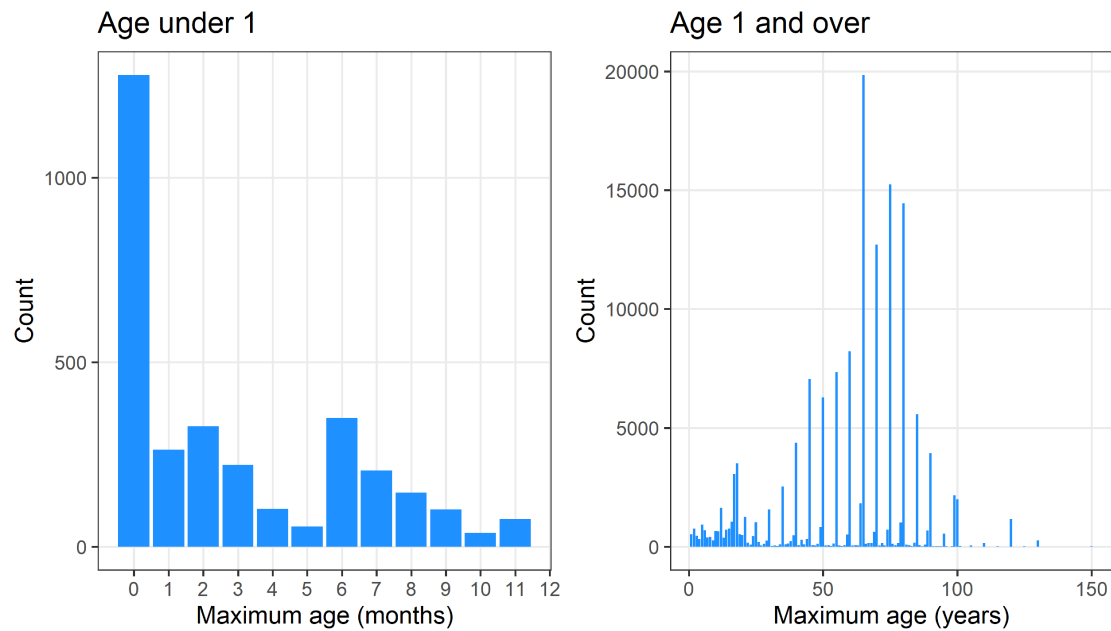

This plot is just for the 150,717 studies that had a maximum age limit. The oldest exclusion for maximum age was 150 years.

**Healthy volunteers included (clinicaltrials.gov)**

|                   | Freq   | % Valid | % Total |
|-------------------|--------|---------|---------|
| <b>No</b>         | 202374 | 74      | 74      |
| <b>Yes</b>        | 70079  | 26      | 26      |
| <b>&lt;NA&gt;</b> | 535    |         | 0       |
| <b>Total</b>      | 272988 | 100     | 100     |

**Study characteristics (clinicaltrials.gov)****Purpose (clinicaltrials.gov)**

|                                 | Freq   | % Valid | % Total |
|---------------------------------|--------|---------|---------|
| <b>Treatment</b>                | 177513 | 67      | 65      |
| <b>Prevention</b>               | 28945  | 11      | 11      |
| <b>Basic Science</b>            | 13568  | 5       | 5       |
| <b>Supportive Care</b>          | 12463  | 5       | 5       |
| <b>Diagnostic</b>               | 12317  | 5       | 5       |
| <b>Other</b>                    | 12028  | 5       | 4       |
| <b>Health Services Research</b> | 6412   | 2       | 2       |
| <b>Screening</b>                | 2261   | 1       | 1       |
| <b>Device Feasibility</b>       | 754    | 0       | 0       |

|              |        |     |     |
|--------------|--------|-----|-----|
| <NA>         | 6727   |     | 2   |
| <b>Total</b> | 272988 | 100 | 100 |

**Masking (clinicaltrials.gov)**

|                   | Freq   | % Valid | % Total |
|-------------------|--------|---------|---------|
| <b>None</b>       | 152877 | 56      | 56      |
| <b>Single</b>     | 36915  | 14      | 14      |
| <b>Double</b>     | 35433  | 13      | 13      |
| <b>Quadruple</b>  | 26844  | 10      | 10      |
| <b>Triple</b>     | 18873  | 7       | 7       |
| <b>Missing</b>    | 5      | 0       | 0       |
| <b>&lt;NA&gt;</b> | 2041   |         | 1       |
| <b>Total</b>      | 272988 | 100     | 100     |

**Assignment (clinicaltrials.gov)**

|                     | Freq   | % Valid | % Total |
|---------------------|--------|---------|---------|
| <b>Parallel</b>     | 159496 | 59      | 58      |
| <b>Single Group</b> | 78591  | 29      | 29      |
| <b>Crossover</b>    | 23781  | 9       | 9       |
| <b>Sequential</b>   | 4582   | 2       | 2       |
| <b>Factorial</b>    | 3995   | 1       | 1       |
| <b>Missing</b>      | 7      | 0       | 0       |
| <b>&lt;NA&gt;</b>   | 2536   |         | 1       |
| <b>Total</b>        | 272988 | 100     | 100     |

**Allocation (clinicaltrials.gov)**

|                       | Freq   | % Valid | % Total |
|-----------------------|--------|---------|---------|
| <b>Randomized</b>     | 178772 | 66      | 65      |
| <b>N/A</b>            | 61995  | 23      | 23      |
| <b>Non-Randomized</b> | 29732  | 11      | 11      |
| <b>&lt;NA&gt;</b>     | 2489   |         | 1       |
| <b>Total</b>          | 272988 | 100     | 100     |

**Phase (clinicaltrials.gov)**

|                        | Freq   | % Valid | % Total |
|------------------------|--------|---------|---------|
| <b>Early Phase 1</b>   | 3464   | 1       | 1       |
| <b>N/A</b>             | 120353 | 44      | 44      |
| <b>Phase 1</b>         | 32331  | 12      | 12      |
| <b>Phase 1/Phase 2</b> | 11054  | 4       | 4       |
| <b>Phase 2</b>         | 44189  | 16      | 16      |
| <b>Phase 2/Phase 3</b> | 5307   | 2       | 2       |
| <b>Phase 3</b>         | 30120  | 11      | 11      |
| <b>Phase 4</b>         | 26170  | 10      | 10      |

|              |        |     |
|--------------|--------|-----|
| <NA>         | 0      | 0   |
| <b>Total</b> | 272988 | 100 |

### Adaptive/platform trial (clinicaltrials.gov)

|              | Freq   | %   |
|--------------|--------|-----|
| <b>FALSE</b> | 272820 | 100 |
| <b>TRUE</b>  | 168    | 0   |
| <b>Total</b> | 272988 | 100 |

Was an adaptive or platform trial mentioned in the study description.

### Longitudinal (clinicaltrials.gov)

|              | Freq   | %   |
|--------------|--------|-----|
| <b>FALSE</b> | 270702 | 99  |
| <b>TRUE</b>  | 2286   | 1   |
| <b>Total</b> | 272988 | 100 |

Was longitudinal mentioned in the study description.

### Number of outcomes (clinicaltrials.gov)

|               | n_primary | n_secondary |
|---------------|-----------|-------------|
| <b>Min</b>    | 0         | 0           |
| <b>Q1</b>     | 1         | 1           |
| <b>Median</b> | 1         | 2           |
| <b>Q3</b>     | 2         | 5           |
| <b>Max</b>    | 214       | 459         |

Number of primary and secondary outcomes. A small number of studies had a huge number of outcomes.

### Study status (clinicaltrials.gov)

|                                                             | Freq   | %   |
|-------------------------------------------------------------|--------|-----|
| <b>Completed</b>                                            | 149721 | 55  |
| <b>Recruiting</b>                                           | 39237  | 14  |
| <b>Unknown status</b>                                       | 26671  | 10  |
| <b>Terminated</b>                                           | 17641  | 6   |
| <b>Not yet recruiting</b>                                   | 13659  | 5   |
| <b>Active, not recruiting</b>                               | 13370  | 5   |
| <b>Withdrawn</b>                                            | 8019   | 3   |
| <b>Enrolling by invitation</b>                              | 2070   | 1   |
| <b>Suspended</b>                                            | 1393   | 1   |
| <b>Unknown status [Previously: Active, not recruiting]</b>  | 1195   | 0   |
| <b>Unknown status [Previously: Enrolling by invitation]</b> | 12     | 0   |
| <b>Total</b>                                                | 272988 | 100 |

## Funding (clinicaltrials.gov)

### Lead sponsor type (clinicaltrials.gov)

|                 | Freq   | %   |
|-----------------|--------|-----|
| <b>Other</b>    | 190273 | 70  |
| <b>Industry</b> | 74612  | 27  |
| <b>NIH</b>      | 4941   | 2   |
| <b>U.S. Fed</b> | 3162   | 1   |
| <b>Total</b>    | 272988 | 100 |

## Sample size (clinicaltrials.gov)

### Target and achieved sample size (clinicaltrials.gov)

|               | Achieved | Target   |
|---------------|----------|----------|
| <b>Min</b>    | 0        | 0        |
| <b>Q1</b>     | 22       | 35       |
| <b>Median</b> | 52       | 70       |
| <b>Q3</b>     | 139      | 178      |
| <b>Max</b>    | 20121212 | 20000000 |

The table shows summary statistics.

There were 5 studies with a zero target sample size.

### Histogram of sample size (clinicaltrials.gov)

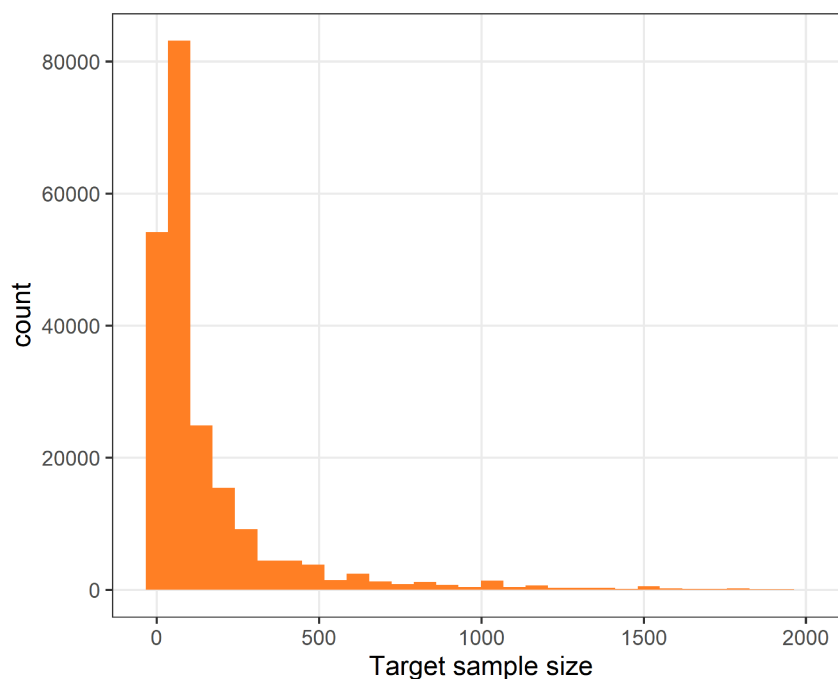



The plot above is for the 212,443 studies with a target sample size under 2,000.

### Histogram looking for digit preference in target sample size (clinicaltrials.gov)

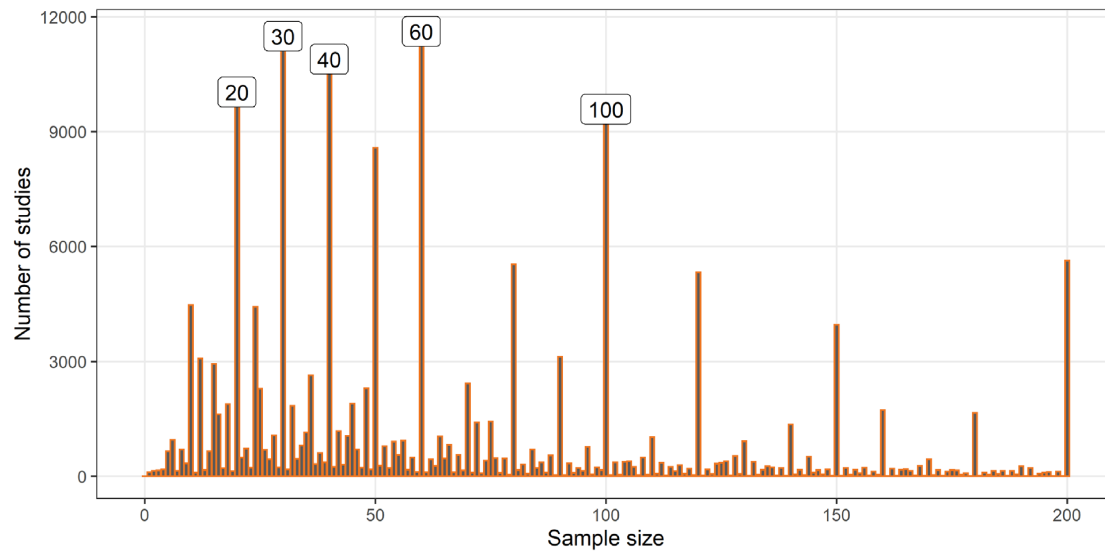

The plot above is for the 171,768 studies with a target sample size of 200 or fewer.

There is a strong digit preference at multiples of ten. The modal sample size is . The top five sample sizes are shown for each sample size type.

## ANZCTR

These summary statistics are for trials registered in ANZCTR and not clinicaltrials.gov.

The total number of studies is 17,531. The data were extracted from ANZCTR on 01-Feb-2020.

### Missing data (ANZCTR)

The columns are variables and the rows are observations. The grey areas show missing data.

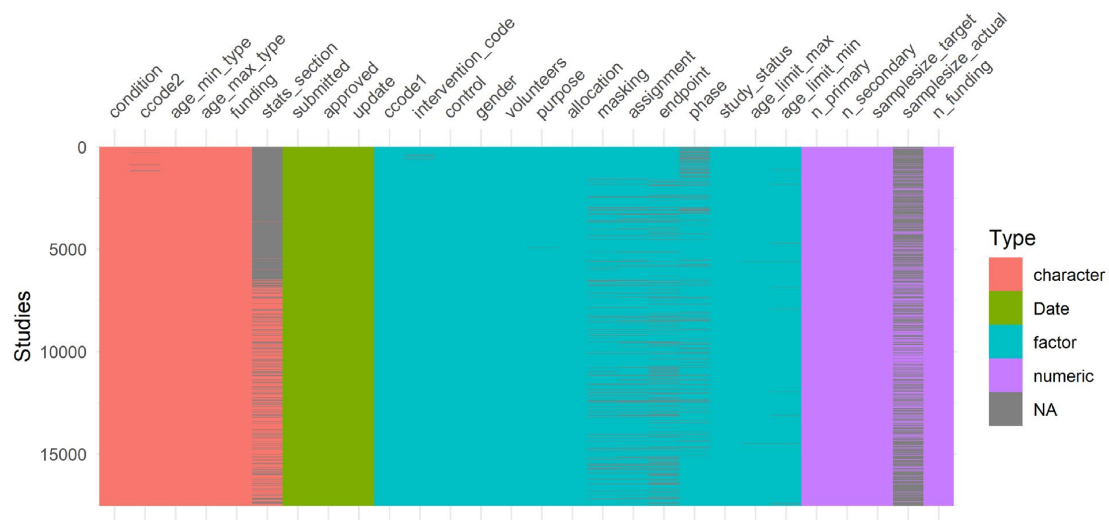

### Counts of missing data (ANZCTR)

The plots below shows the counts of missing data.

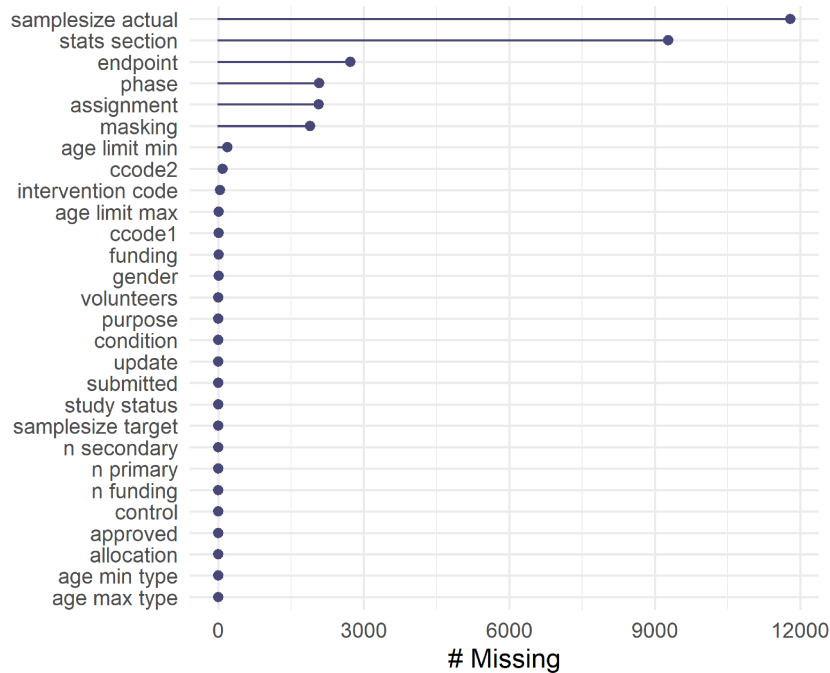

## Registration and dates (ANZCTR)

### Registration dates (ANZCTR)

| date      | n      | median   | q1       | q3       |
|-----------|--------|----------|----------|----------|
| submitted | 17,531 | Oct 2014 | Jan 2011 | Dec 2017 |
| approved  | 17,531 | Nov 2014 | Feb 2011 | Jan 2018 |
| update    | 17,531 | Apr 2017 | Apr 2013 | Jun 2019 |

The summary statistics are the median and inter-quartile range.

### Anticipated start date (ANZCTR)

| min      | q1       | median   | q3       | max      |
|----------|----------|----------|----------|----------|
| Jun 1982 | Jan 2010 | Nov 2013 | Oct 2017 | Dec 2022 |

The summary statistics are the minimum, inter-quartile range, median and maximum.

## Inclusions/Exclusions (ANZCTR)

### Gender included (ANZCTR)

|                | Freq  | % Valid | % Total |
|----------------|-------|---------|---------|
| <b>All</b>     | 14900 | 85      | 85      |
| <b>Females</b> | 1701  | 10      | 10      |
| <b>Males</b>   | 926   | 5       | 5       |

|              |       |     |
|--------------|-------|-----|
| <NA>         | 4     | 0   |
| <b>Total</b> | 17531 | 100 |

### Age included (ANZCTR)

#### Minimum age (ANZCTR)

|                   | Freq  | % Valid | % Total |
|-------------------|-------|---------|---------|
| <b>Restricted</b> | 16623 | 95      | 95      |
| <b>No limit</b>   | 632   | 4       | 4       |
| <b>Not stated</b> | 271   | 2       | 2       |
| <NA>              | 5     | 0       | 0       |
| <b>Total</b>      | 17531 | 100     | 100     |

#### Minimum age limit in years (ANZCTR)

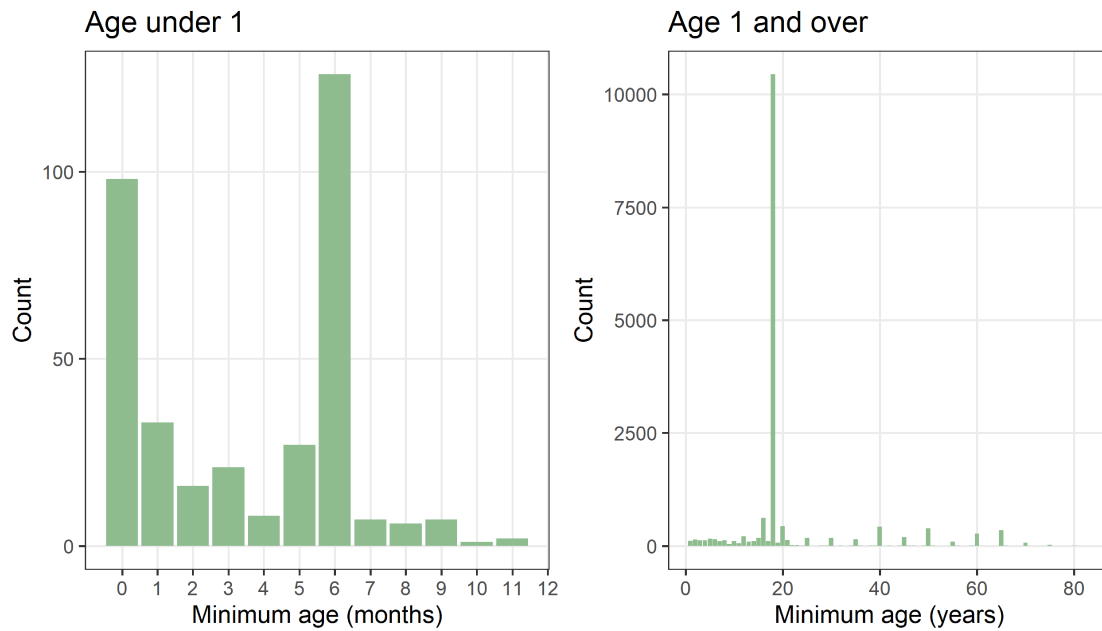

This plot is just for the 16,438 studies that had a minimum age limit. By far the most common minimum age is 18. The oldest exclusion for minimum age was 83 years.

#### Maximum age (ANZCTR)

|                   | Freq  | % Valid | % Total |
|-------------------|-------|---------|---------|
| <b>Restricted</b> | 9092  | 52      | 52      |
| <b>No limit</b>   | 7613  | 43      | 43      |
| <b>Not stated</b> | 821   | 5       | 5       |
| <NA>              | 5     | 0       | 0       |
| <b>Total</b>      | 17531 | 100     | 100     |

### Maximum age limit in years (ANZCTR)

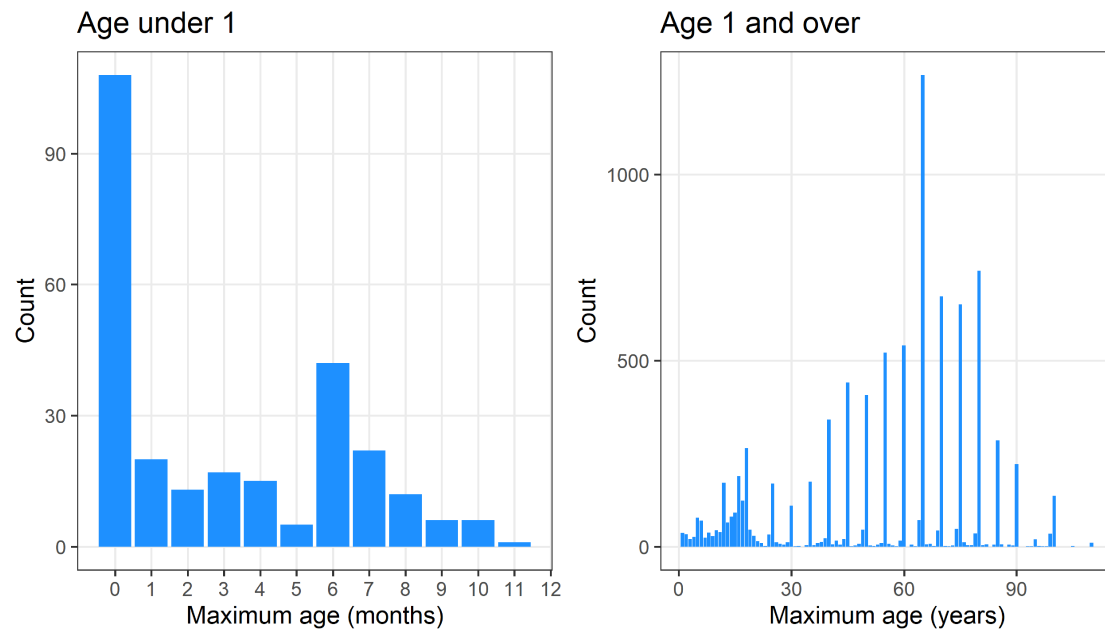

This plot is just for the 9,081 studies that had a maximum age limit. The oldest exclusion for maximum age was 110 years.

There is a strong digit preference in the age limit with spikes in multiples of five years.

### Healthy volunteers included (ANZCTR)

|                   | Freq  | % Valid | % Total |
|-------------------|-------|---------|---------|
| <b>No</b>         | 12907 | 74      | 74      |
| <b>Yes</b>        | 4621  | 26      | 26      |
| <b>&lt;NA&gt;</b> | 3     |         | 0       |
| <b>Total</b>      | 17531 | 100     | 100     |

### Study characteristics (ANZCTR)

#### Purpose (ANZCTR)

|                                             | Freq  | % Valid | % Total |
|---------------------------------------------|-------|---------|---------|
| <b>Treatment</b>                            | 12056 | 69      | 69      |
| <b>Prevention</b>                           | 3257  | 19      | 19      |
| <b>Educational / counselling / training</b> | 1432  | 8       | 8       |
| <b>Diagnosis</b>                            | 784   | 4       | 4       |
| <b>&lt;NA&gt;</b>                           | 2     |         | 0       |
| <b>Total</b>                                | 17531 | 100     | 100     |

**Assignment (ANZCTR)**

|                     | Freq  | % Valid | % Total |
|---------------------|-------|---------|---------|
| <b>Parallel</b>     | 10020 | 65      | 57      |
| <b>Single group</b> | 2427  | 16      | 14      |
| <b>Crossover</b>    | 1925  | 12      | 11      |
| <b>Other</b>        | 863   | 6       | 5       |
| <b>Factorial</b>    | 226   | 1       | 1       |
| <b>&lt;NA&gt;</b>   | 2070  |         | 12      |
| <b>Total</b>        | 17531 | 100     | 100     |

**Allocation (ANZCTR)**

|                                    | Freq  | % Valid | % Total |
|------------------------------------|-------|---------|---------|
| <b>Randomised controlled trial</b> | 13155 | 75      | 75      |
| <b>Non-randomised trial</b>        | 4376  | 25      | 25      |
| <b>&lt;NA&gt;</b>                  | 0     |         | 0       |
| <b>Total</b>                       | 17531 | 100     | 100     |

**Masking (ANZCTR)**

|                                | Freq  | % Valid | % Total |
|--------------------------------|-------|---------|---------|
| <b>Blinded (masking used)</b>  | 8274  | 53      | 47      |
| <b>Open (masking not used)</b> | 7366  | 47      | 42      |
| <b>&lt;NA&gt;</b>              | 1891  |         | 11      |
| <b>Total</b>                   | 17531 | 100     | 100     |

**Intervention code (ANZCTR)**

|                                    | Freq  | % Valid | % Total |
|------------------------------------|-------|---------|---------|
| <b>Treatment: Drugs</b>            | 4473  | 26      | 26      |
| <b>Treatment: Other</b>            | 3502  | 20      | 20      |
| <b>Prevention</b>                  | 1868  | 11      | 11      |
| <b>Treatment: Devices</b>          | 1802  | 10      | 10      |
| <b>Behaviour</b>                   | 1260  | 7       | 7       |
| <b>Rehabilitation</b>              | 1237  | 7       | 7       |
| <b>Lifestyle</b>                   | 970   | 6       | 6       |
| <b>Other interventions</b>         | 667   | 4       | 4       |
| <b>Treatment: Surgery</b>          | 555   | 3       | 3       |
| <b>Diagnosis / Prognosis</b>       | 514   | 3       | 3       |
| <b>Early detection / Screening</b> | 408   | 2       | 2       |
| <b>None</b>                        | 230   | 1       | 1       |
| <b>Not applicable</b>              | 11    | 0       | 0       |
| <b>&lt;NA&gt;</b>                  | 34    |         | 0       |
| <b>Total</b>                       | 17531 | 100     | 100     |

**Endpoint (ANZCTR)**

|                                            | Freq  | % Valid | % Total |
|--------------------------------------------|-------|---------|---------|
| <b>Efficacy</b>                            | 9489  | 64      | 54      |
| <b>Safety/efficacy</b>                     | 3868  | 26      | 22      |
| <b>Safety</b>                              | 745   | 5       | 4       |
| <b>Pharmacokinetics</b>                    | 226   | 2       | 1       |
| <b>Bio-equivalence</b>                     | 152   | 1       | 1       |
| <b>Pharmacokinetics / pharmacodynamics</b> | 145   | 1       | 1       |
| <b>Pharmacodynamics</b>                    | 99    | 1       | 1       |
| <b>Bio-availability</b>                    | 86    | 1       | 0       |
| <b>&lt;NA&gt;</b>                          | 2721  |         | 16      |
| <b>Total</b>                               | 17531 | 100     | 100     |

**Phase (ANZCTR)**

|                          | Freq  | % Valid | % Total |
|--------------------------|-------|---------|---------|
| <b>Not Applicable</b>    | 9830  | 64      | 56      |
| <b>Phase 0</b>           | 58    | 0       | 0       |
| <b>Phase 1</b>           | 1161  | 8       | 7       |
| <b>Phase 1 / Phase 2</b> | 331   | 2       | 2       |
| <b>Phase 2</b>           | 1239  | 8       | 7       |
| <b>Phase 2 / Phase 3</b> | 269   | 2       | 2       |
| <b>Phase 3</b>           | 907   | 6       | 5       |
| <b>Phase 3 / Phase 4</b> | 251   | 2       | 1       |
| <b>Phase 4</b>           | 1401  | 9       | 8       |
| <b>&lt;NA&gt;</b>        | 2084  |         | 12      |
| <b>Total</b>             | 17531 | 100     | 100     |

**Control (ANZCTR)**

|                        | Freq  | % Valid | % Total |
|------------------------|-------|---------|---------|
| <b>Active</b>          | 10584 | 60      | 60      |
| <b>Placebo</b>         | 3527  | 20      | 20      |
| <b>Uncontrolled</b>    | 2780  | 16      | 16      |
| <b>Dose comparison</b> | 337   | 2       | 2       |
| <b>Historical</b>      | 303   | 2       | 2       |
| <b>&lt;NA&gt;</b>      | 0     |         | 0       |
| <b>Total</b>           | 17531 | 100     | 100     |

**Number of outcomes (ANZCTR)**

|               | n_primary | n_secondary |
|---------------|-----------|-------------|
| <b>Min</b>    | 0         | 0           |
| <b>Q1</b>     | 1         | 1           |
| <b>Median</b> | 1         | 3           |
| <b>Q3</b>     | 2         | 6           |

Max 12 57

Number of primary and secondary outcomes.

## Health conditions (ANZCTR)

### Condition code #1 (ANZCTR)

|                                               | Freq  | %   |
|-----------------------------------------------|-------|-----|
| <b>Mental Health</b>                          | 2029  | 12  |
| <b>Cancer</b>                                 | 1592  | 9   |
| <b>Musculoskeletal</b>                        | 1157  | 7   |
| <b>Cardiovascular</b>                         | 1075  | 6   |
| <b>Respiratory</b>                            | 985   | 6   |
| <b>Public Health</b>                          | 978   | 6   |
| <b>Neurological</b>                           | 936   | 5   |
| <b>Anaesthesiology</b>                        | 927   | 5   |
| <b>Diet and Nutrition</b>                     | 917   | 5   |
| <b>Metabolic and Endocrine</b>                | 906   | 5   |
| <b>Physical Medicine / Rehabilitation</b>     | 671   | 4   |
| <b>Infection</b>                              | 664   | 4   |
| <b>Reproductive Health and Childbirth</b>     | 611   | 3   |
| <b>Oral and Gastrointestinal</b>              | 609   | 3   |
| <b>Surgery</b>                                | 478   | 3   |
| <b>Renal and Urogenital</b>                   | 380   | 2   |
| <b>Eye</b>                                    | 352   | 2   |
| <b>Inflammatory and Immune System</b>         | 345   | 2   |
| <b>Other</b>                                  | 341   | 2   |
| <b>Injuries and Accidents</b>                 | 302   | 2   |
| <b>Skin</b>                                   | 294   | 2   |
| <b>Stroke</b>                                 | 283   | 2   |
| <b>Alternative and Complementary Medicine</b> | 262   | 1   |
| <b>Blood</b>                                  | 211   | 1   |
| <b>Human Genetics and Inherited Disorders</b> | 95    | 1   |
| <b>Ear</b>                                    | 85    | 0   |
| <b>Emergency medicine</b>                     | 38    | 0   |
| <b>Total</b>                                  | 17523 | 100 |

### Condition code #2, top 10 (ANZCTR)

|                                              | Freq  | %  |
|----------------------------------------------|-------|----|
| <b>Other</b>                                 | 12634 | 72 |
| <b>Other muscular and skeletal disorders</b> | 665   | 4  |
| <b>Diabetes</b>                              | 643   | 4  |
| <b>Depression</b>                            | 502   | 3  |
| <b>Health promotion/education</b>            | 502   | 3  |
| <b>Obesity</b>                               | 475   | 3  |
| <b>Other diet and nutrition disorders</b>    | 435   | 2  |



|                                                                                                   |       |     |
|---------------------------------------------------------------------------------------------------|-------|-----|
| <b>Other diseases of the mouth, teeth, oesophagus, digestive system including liver and colon</b> | 430   | 2   |
| <b>Anaesthetics</b>                                                                               | 423   | 2   |
| <b>Other respiratory disorders / diseases</b>                                                     | 420   | 2   |
| <b>Physiotherapy</b>                                                                              | 402   | 2   |
| <b>Total</b>                                                                                      | 17531 | 100 |

There are 155 condition codes, hence we just show the top ten. Conditions outside the top ten have been grouped together as 'other'.

### Condition as free text, top 10 (ANZCTR)

|                        | Freq  | %   |
|------------------------|-------|-----|
| <b>Other</b>           | 15873 | 91  |
| <b>obesity</b>         | 291   | 2   |
| <b>depression</b>      | 263   | 2   |
| <b>stroke</b>          | 204   | 1   |
| <b>type 2 diabetes</b> | 176   | 1   |
| <b>breast cancer</b>   | 143   | 1   |
| <b>malaria</b>         | 127   | 1   |
| <b>prostate cancer</b> | 125   | 1   |
| <b>asthma</b>          | 114   | 1   |
| <b>anxiety</b>         | 108   | 1   |
| <b>osteoarthritis</b>  | 107   | 1   |
| <b>Total</b>           | 17531 | 100 |

There are 8,395 conditions as free text, hence we just show the top ten.

This field is free text and so relies on what researchers write. Some categories could likely be combined, e.g., "prostate cancer" and "prostate cancer patients".

### Study status (ANZCTR)

#### Study status (ANZCTR)

|                               | Freq  | %   |
|-------------------------------|-------|-----|
| <b>Completed</b>              | 7175  | 41  |
| <b>Not yet recruiting</b>     | 4259  | 24  |
| <b>Recruiting</b>             | 4072  | 23  |
| <b>Active, not recruiting</b> | 1042  | 6   |
| <b>Stopped early</b>          | 602   | 3   |
| <b>Withdrawn</b>              | 303   | 2   |
| <b>Suspended</b>              | 78    | 0   |
| <b>Total</b>                  | 17531 | 100 |

### Sponsors and funding (ANZCTR)

#### Top institutes (ANZCTR)

|  | Freq | % |
|--|------|---|
|  |      |   |

|                                      |       |     |
|--------------------------------------|-------|-----|
| <b>Other</b>                         | 15163 | 86  |
| <b>University of Sydney</b>          | 494   | 3   |
| <b>University of Queensland</b>      | 305   | 2   |
| <b>Monash University</b>             | 252   | 1   |
| <b>Royal Adelaide Hospital</b>       | 244   | 1   |
| <b>Curtin University</b>             | 231   | 1   |
| <b>University of Melbourne</b>       | 204   | 1   |
| <b>University of South Australia</b> | 163   | 1   |
| <b>Deakin University</b>             | 159   | 1   |
| <b>Griffith University</b>           | 158   | 1   |
| <b>Royal Melbourne Hospital</b>      | 158   | 1   |
| <b>Total</b>                         | 17531 | 100 |

There are 7,831 institutes, hence we just show the top ten.

### Funding (ANZCTR)

#### Number of funders (ANZCTR)

|              | Freq  | %   |
|--------------|-------|-----|
| <b>0</b>     | 767   | 4   |
| <b>1</b>     | 14046 | 80  |
| <b>2</b>     | 2044  | 12  |
| <b>3</b>     | 456   | 3   |
| <b>4</b>     | 133   | 1   |
| <b>5</b>     | 43    | 0   |
| <b>6</b>     | 16    | 0   |
| <b>7</b>     | 7     | 0   |
| <b>8</b>     | 9     | 0   |
| <b>9</b>     | 6     | 0   |
| <b>11</b>    | 2     | 0   |
| <b>12</b>    | 1     | 0   |
| <b>14</b>    | 1     | 0   |
| <b>Total</b> | 17531 | 100 |

#### Funding type (ANZCTR)

|                                        | Freq  | %   |
|----------------------------------------|-------|-----|
| <b>Government body</b>                 | 4570  | 22  |
| <b>University</b>                      | 3930  | 19  |
| <b>Commercial sector/Industry</b>      | 3706  | 18  |
| <b>Charities/Societies/Foundations</b> | 3561  | 17  |
| <b>Hospital</b>                        | 2602  | 13  |
| <b>Self funded/Unfunded</b>            | 922   | 4   |
| <b>Other Collaborative groups</b>      | 646   | 3   |
| <b>Other</b>                           | 630   | 3   |
| <b>Total</b>                           | 20567 | 100 |

This includes multiple results per study.

**Funders, top 10 (ANZCTR)**

|                                               | Freq  | %   |
|-----------------------------------------------|-------|-----|
| <b>Other</b>                                  | 17879 | 87  |
| <b>NHMRC</b>                                  | 1736  | 8   |
| <b>ARC</b>                                    | 189   | 1   |
| <b>Health Research Council of New Zealand</b> | 170   | 1   |
| <b>Monash University</b>                      | 124   | 1   |
| <b>University of Otago</b>                    | 119   | 1   |
| <b>Curtin University</b>                      | 77    | 0   |
| <b>The University of Sydney</b>               | 76    | 0   |
| <b>University of Sydney</b>                   | 70    | 0   |
| <b>Deakin University</b>                      | 65    | 0   |
| <b>Health Research Council</b>                | 63    | 0   |
| <b>Total</b>                                  | 20568 | 100 |

This includes multiple results per study.

There are 10,588 funders, hence we just show the top ten.

**Sample size (ANZCTR)****Target and achieved sample size (ANZCTR)**

|               | Achieved | Target |
|---------------|----------|--------|
| <b>Min</b>    | 0        | 0      |
| <b>Q1</b>     | 26       | 31     |
| <b>Median</b> | 60       | 66     |
| <b>Q3</b>     | 140      | 158    |
| <b>Max</b>    | 139977   | 714306 |

The table shows summary statistics.

There were 2 studies with a zero target sample size.

### Histogram of sample size (ANZCTR)

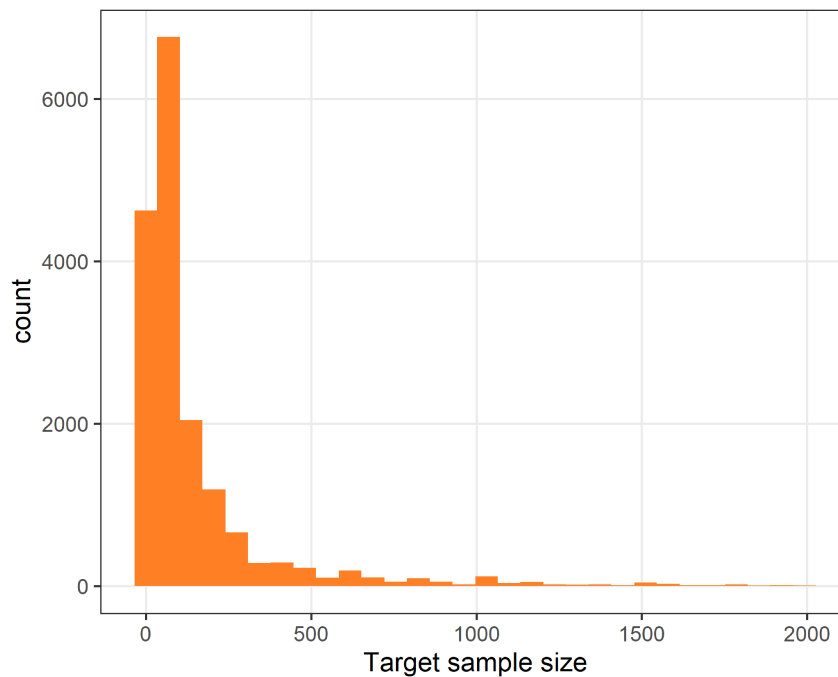

The plot above is for the 17,136 studies with a target sample size under 2,000.

### Histogram looking for digit preference in target sample size (ANZCTR)

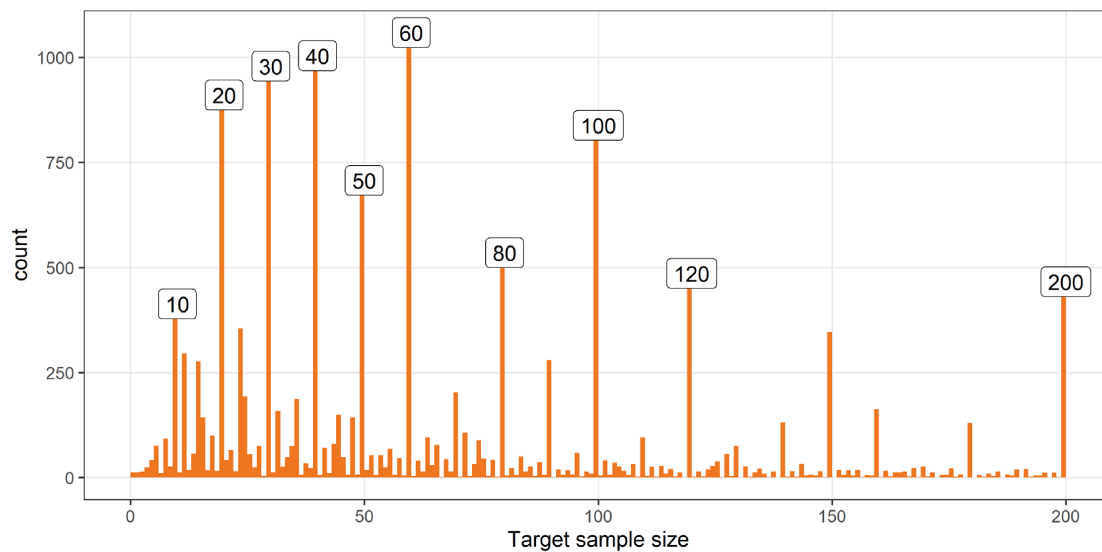

The plot above is for the 14,210 studies with a target sample size of 200 or fewer.

There is a strong digit preference at multiples of ten. The modal sample size is 60 and this is dominated by withdrawn studies.
