# Supplementary material for: Target and actual sample sizes for studies from two trial registries from 1999 to 2020: an observational study
Source: HighWire-hosted journal article supplement (doi:10.1136/bmjopen-2021-053377), 2021-12-01

## Supplement Figure 4: Cross-validated errors for the elastic net models

The models were fitted using the “glmnet” package in R. We used 10-fold cross-validation.

### Models of the target and actual sample size

#### a) ANZCTR

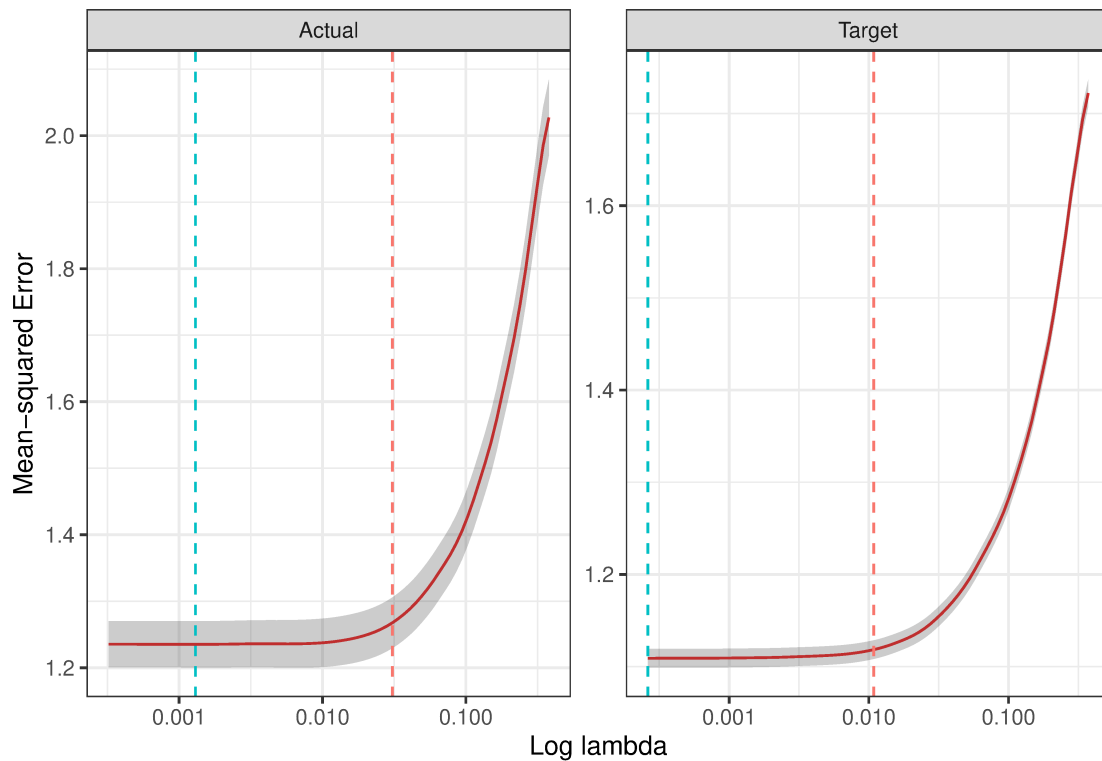

The shaded area is the 95% confidence interval for the error. The blue vertical dotted line is the minimum mean-squared error. The red vertical dotted line is the minimum mean-squared error plus 1 standard error.

b) `clintrials.gov`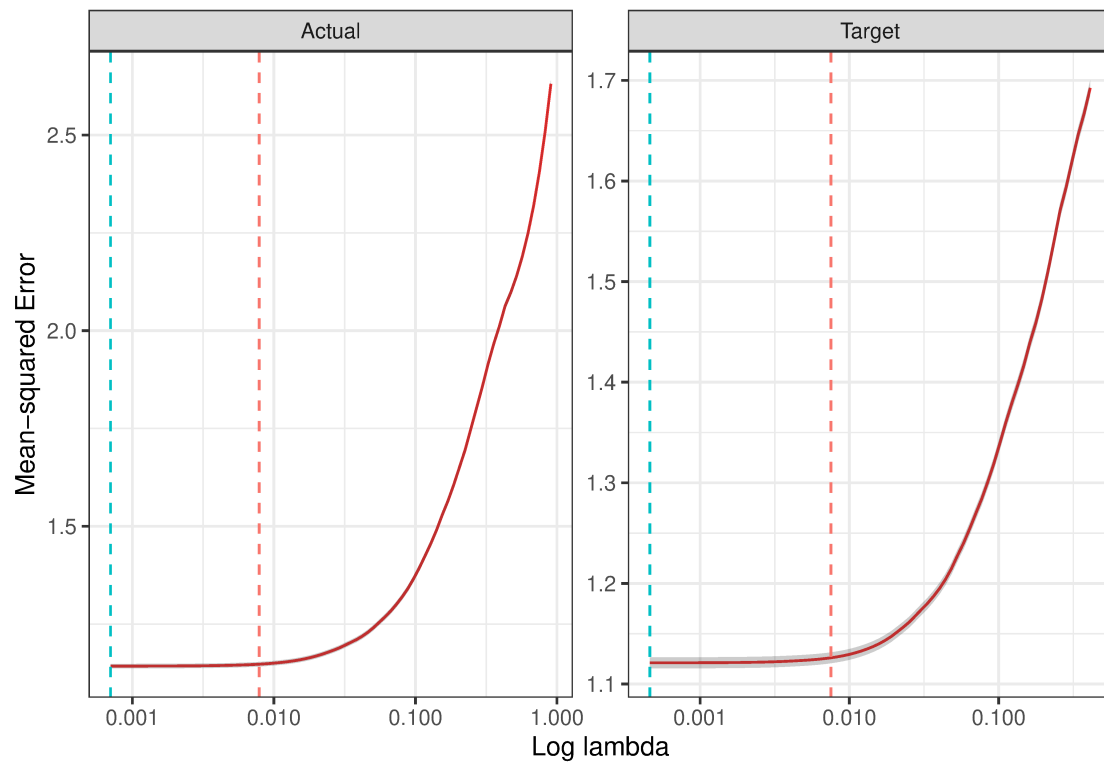

## Models of the target to actual sample size ratio

### a) ANZCTR

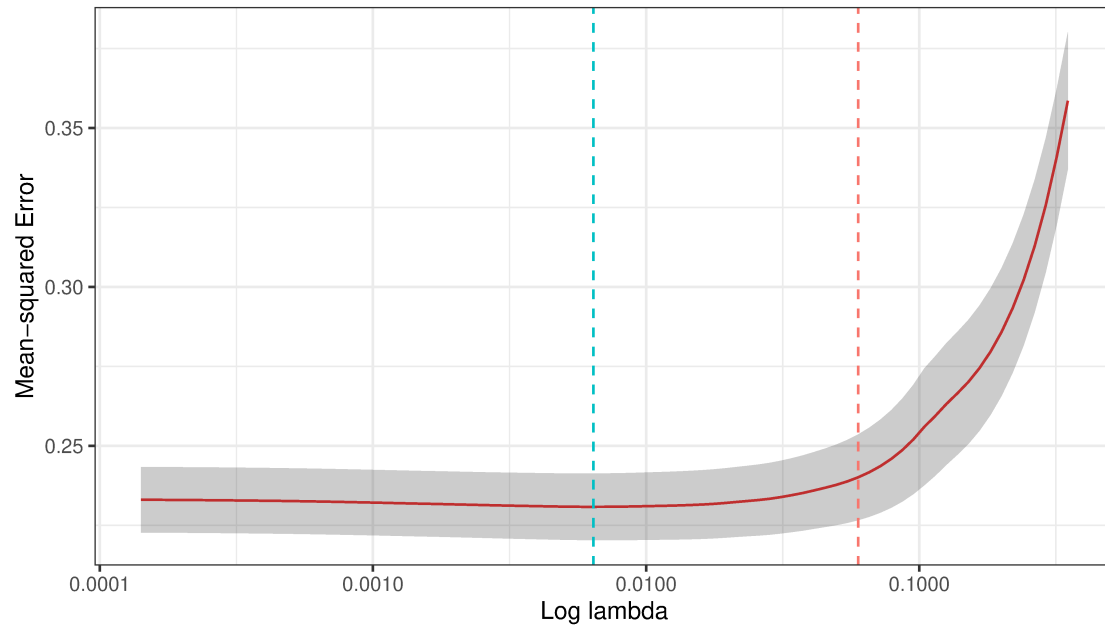

The confidence intervals are much wider here because the sample size for the ratio models is smaller.

### b) clinicaltrials.gov

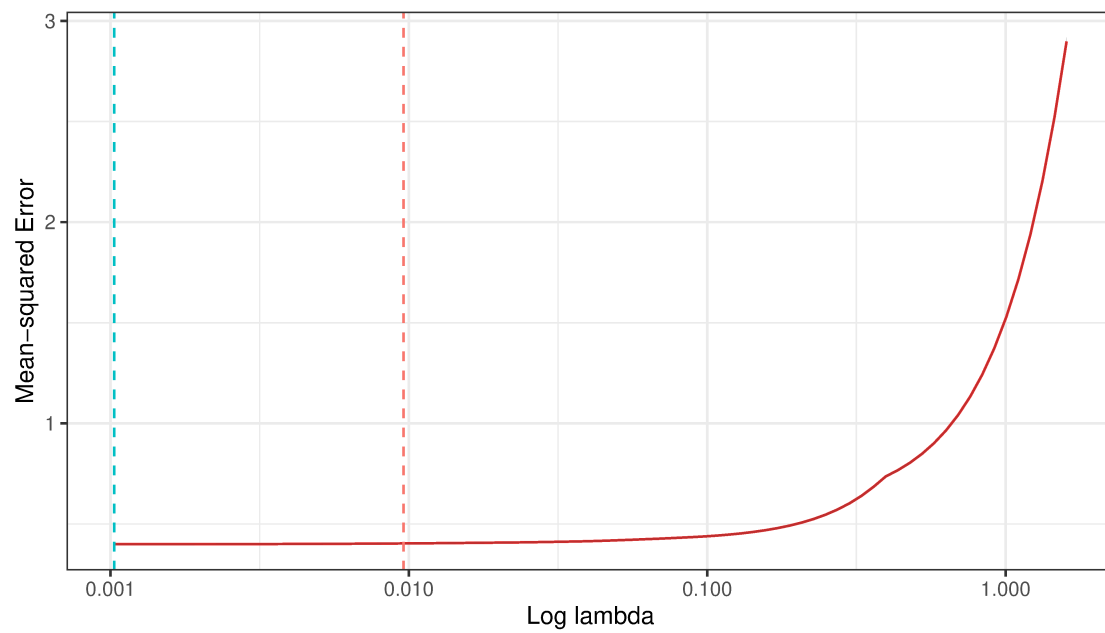

Supplement: bmjopen-2021-053377supp008_data_supplement.pdf [file bmjopen-2021-053377supp008_data_supplement.pdf]
